# Supplementary material for: Diffusion based modelling of temperature and moisture interactive effects on carbon fluxes of mineral soils
Source: Copernicus journal article supplement (doi:10.5194/bg-2018-95), 2018-03-28
Supplement: Supplementary file 1 [file bg-2018-95-supplement.pdf]

## Model M2-dif steady state equations

The equilibrium solutions to the C pools of model M2-dif are given by:

$$\begin{aligned}
 C_P = & K_D r_{ed} z (-2g I_{ml} f_{ge} f_{ug} r_{md} + 2g I_{ml} f_{ug} r_{md} - 2g I_{sl} f_{ge} r_{mr} f_{ug} - 2g I_{sl} f_{ge} f_{ug} r_{md} + 2g I_{sl} r_{mr} + \\
 & 2g I_{sl} r_{md} - I_{ml} f_{ge} f_{ug} r_{ed} r_{md} + I_{ml} f_{ug} r_{ed} r_{md} - I_{sl} f_{ge} r_{mr} f_{ug} r_{ed} - I_{sl} f_{ge} f_{ug} r_{ed} r_{md} + I_{sl} r_{mr} r_{ed} + \\
 & I_{sl} r_{ed} r_{md}) / (g I_{ml} V_D f_{ge} r_{mr} f_{ug} + g I_{ml} V_D f_{ge} f_{ug} r_{md} + 2g I_{ml} f_{ge} f_{ug} r_{ed} r_{md} - 2g I_{ml} f_{ug} r_{ed} r_{md} + \\
 & g I_{sl} V_D f_{ge} r_{mr} f_{ug} + g I_{sl} V_D f_{ge} f_{ug} r_{md} + 2g I_{sl} f_{ge} r_{mr} f_{ug} r_{ed} + 2g I_{sl} f_{ge} f_{ug} r_{ed} r_{md} - 2g I_{sl} r_{mr} r_{ed} - \\
 & 2g I_{sl} r_{ed} r_{md} + I_{ml} f_{ge} f_{ug} r_{ed}^2 r_{md} - I_{ml} f_{ug} r_{ed}^2 r_{md} + I_{sl} f_{ge} r_{mr} f_{ug} r_{ed}^2 + I_{sl} f_{ge} f_{ug} r_{ed}^2 r_{md} - I_{sl} r_{mr} r_{ed}^2 - \\
 & I_{sl} r_{ed}^2 r_{md})
 \end{aligned} \tag{A1}$$

$$C_D = -z(r_{mr} + r_{md}) / (g V_U f_{ug} (f_{ge} - 1)) \tag{A2}$$

$$C_M = f_{ug} (I_{ml} f_{ge} - I_{ml} + I_{sl} f_{ge} - I_{sl}) / (f_{ge} r_{mr} f_{ug} - r_{mr} + f_{ug} r_{md} - r_{md}) \tag{A3}$$

$$\begin{aligned}
 C_{ED} = & -g f_{ge} f_{ug} (I_{ml} r_{mr} + I_{ml} r_{md} + I_{sl} r_{mr} + I_{sl} r_{md}) / (r_{ed} (2g f_{ge} r_{mr} f_{ug} - 2g r_{mr} + 2g f_{ug} r_{md} - \\
 & 2g r_{md} + f_{ge} r_{mr} f_{ug} r_{ed} - r_{mr} r_{ed} + f_{ug} r_{ed} r_{md} - r_{ed} r_{md}))
 \end{aligned} \tag{A4}$$

$$\begin{aligned}
 C_{EM} = & -f_{ge} f_{ug} (g I_{ml} r_{mr} + g I_{ml} r_{md} + g I_{sl} r_{mr} + g I_{sl} r_{md} + I_{ml} r_{mr} r_{ed} + I_{ml} r_{ed} r_{md} + I_{sl} r_{mr} r_{ed} + \\
 & I_{sl} r_{ed} r_{md}) / (r_{ed} (2g f_{ge} r_{mr} f_{ug} - 2g r_{mr} + 2g f_{ug} r_{md} - 2g r_{md} + f_{ge} r_{mr} f_{ug} r_{ed} - r_{mr} r_{ed} + f_{ug} r_{ed} r_{md} - \\
 & r_{ed} r_{md}))
 \end{aligned} \tag{A5}$$

In these equations,  $I_{ml}$  and  $I_{sl}$  are metabolic and structural litter input, which represent litter additions to the  $C_D$  and  $C_P$  pools, respectively.

## Supplementary figures

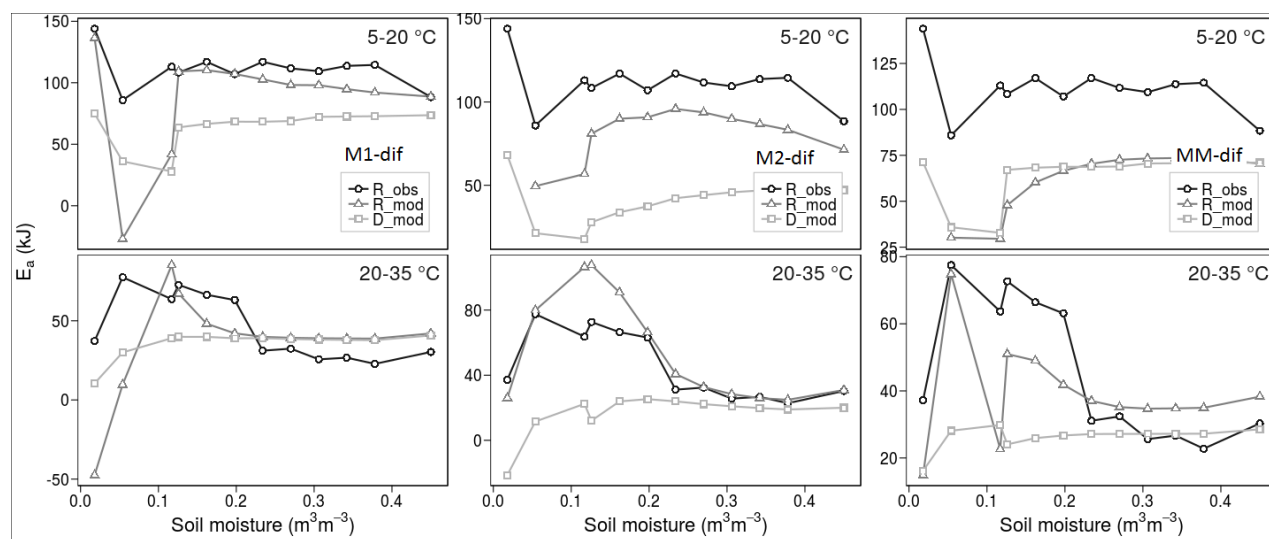

Figure S1: Relationships of apparent activation energies against soil volumetric moisture content. Values are given for measured and modelled respiration and for modelled decomposition. Each plot compares observed values against a different calibrated model (M1-dif, M2-dif and MM-dif). Apparent activation energies are shown for the temperature ranges 5-20 (top panel) and 20-35 °C (bottom panel).

5

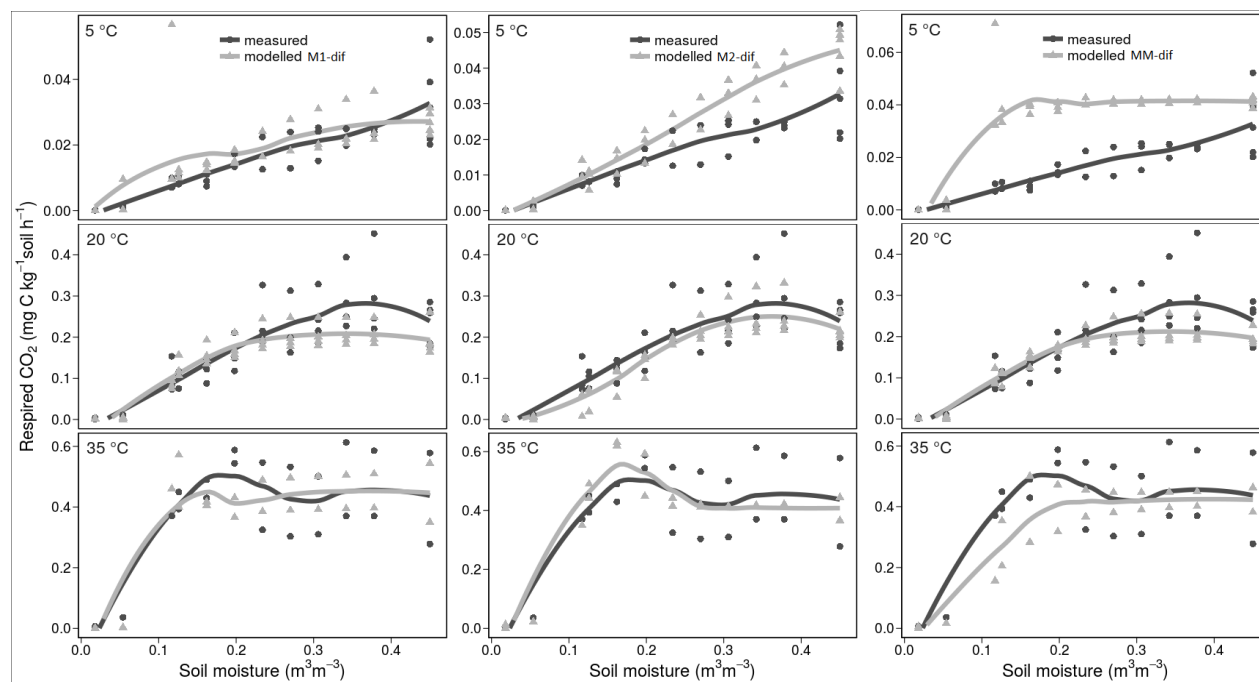

Figure S2: The relationship between respiration rates and soil moisture content shown for measured and modelled values. Each plot compares the measurements a different model (M1-dif, M2-dif, MM-dif). Lines are a smooth loess fit to show the average relationship.

10

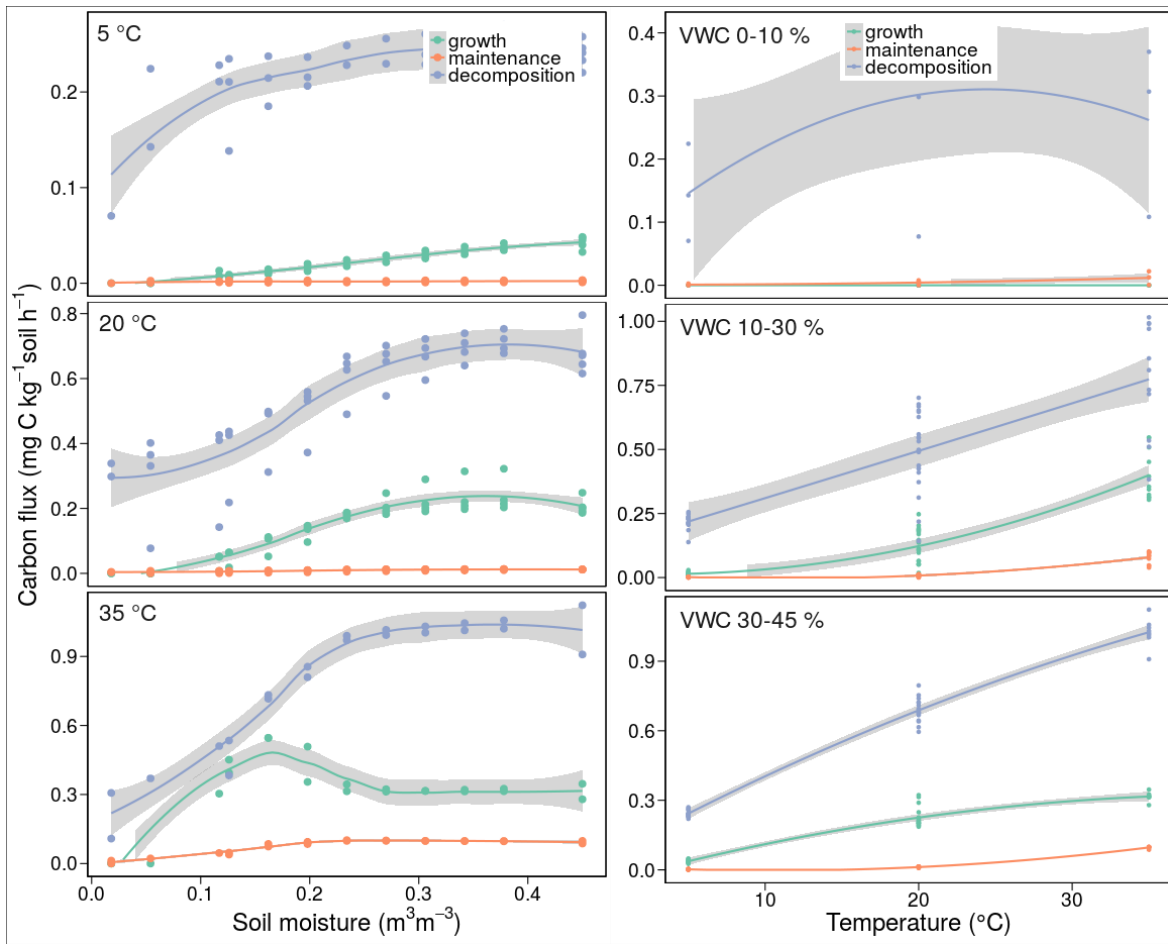

**Figure S3: Respiration (growth and maintenance) and decomposition fluxes modelled using M2-dif against soil moisture (left plot) and soil temperature (right plot). Shaded areas denote the 95% confidence intervals from a loess fit.**

5
