# Supplementary material for: Diffusion based modelling of temperature and moisture interactive effects on carbon fluxes of mineral soils
Source: Copernicus journal article supplement (doi:10.5194/bg-2018-95), 2018-03-28
Supplement: Supplementary file [file bg-2018-95-AC2-supplement.pdf]

## Model M2-dif steady state equations

The equilibrium solutions to the C pools of model M2-dif are given by:

$$\begin{aligned}
 C_P = & K_D r_{ed} z (-2g I_{ml} f_{ge} f_{ug} r_{md} + 2g I_{ml} f_{ug} r_{md} - 2g I_{sl} f_{ge} r_{mr} f_{ug} - 2g I_{sl} f_{ge} f_{ug} r_{md} + 2g I_{sl} r_{mr} + \\
 & 2g I_{sl} r_{md} - I_{ml} f_{ge} f_{ug} r_{ed} r_{md} + I_{ml} f_{ug} r_{ed} r_{md} - I_{sl} f_{ge} r_{mr} f_{ug} r_{ed} - I_{sl} f_{ge} f_{ug} r_{ed} r_{md} + I_{sl} r_{mr} r_{ed} + \\
 & I_{sl} r_{ed} r_{md}) / (g I_{ml} V_D f_{ge} r_{mr} f_{ug} + g I_{ml} V_D f_{ge} f_{ug} r_{md} + 2g I_{ml} f_{ge} f_{ug} r_{ed} r_{md} - 2g I_{ml} f_{ug} r_{ed} r_{md} + \\
 & g I_{sl} V_D f_{ge} r_{mr} f_{ug} + g I_{sl} V_D f_{ge} f_{ug} r_{md} + 2g I_{sl} f_{ge} r_{mr} f_{ug} r_{ed} + 2g I_{sl} f_{ge} f_{ug} r_{ed} r_{md} - 2g I_{sl} r_{mr} r_{ed} - \\
 & 2g I_{sl} r_{ed} r_{md} + I_{ml} f_{ge} f_{ug} r_{ed}^2 r_{md} - I_{ml} f_{ug} r_{ed}^2 r_{md} + I_{sl} f_{ge} r_{mr} f_{ug} r_{ed}^2 + I_{sl} f_{ge} f_{ug} r_{ed}^2 r_{md} - I_{sl} r_{mr} r_{ed}^2 - \\
 & I_{sl} r_{ed}^2 r_{md})
 \end{aligned} \tag{A1}$$

$$C_D = -z(r_{mr} + r_{md}) / (g V_U f_{ug} (f_{ge} - 1)) \tag{A2}$$

$$C_M = f_{ug} (I_{ml} f_{ge} - I_{ml} + I_{sl} f_{ge} - I_{sl}) / (f_{ge} r_{mr} f_{ug} - r_{mr} + f_{ug} r_{md} - r_{md}) \tag{A3}$$

$$\begin{aligned}
 C_{ED} = & -g f_{ge} f_{ug} (I_{ml} r_{mr} + I_{ml} r_{md} + I_{sl} r_{mr} + I_{sl} r_{md}) / (r_{ed} (2g f_{ge} r_{mr} f_{ug} - 2g r_{mr} + 2g f_{ug} r_{md} - \\
 & 2g r_{md} + f_{ge} r_{mr} f_{ug} r_{ed} - r_{mr} r_{ed} + f_{ug} r_{ed} r_{md} - r_{ed} r_{md}))
 \end{aligned} \tag{A4}$$

$$\begin{aligned}
 C_{EM} = & -f_{ge} f_{ug} (g I_{ml} r_{mr} + g I_{ml} r_{md} + g I_{sl} r_{mr} + g I_{sl} r_{md} + I_{ml} r_{mr} r_{ed} + I_{ml} r_{ed} r_{md} + I_{sl} r_{mr} r_{ed} + \\
 & I_{sl} r_{ed} r_{md}) / (r_{ed} (2g f_{ge} r_{mr} f_{ug} - 2g r_{mr} + 2g f_{ug} r_{md} - 2g r_{md} + f_{ge} r_{mr} f_{ug} r_{ed} - r_{mr} r_{ed} + f_{ug} r_{ed} r_{md} - \\
 & r_{ed} r_{md}))
 \end{aligned} \tag{A5}$$

In these equations,  $I_{ml}$  and  $I_{sl}$  are metabolic and structural litter input, which represent litter additions to the  $C_D$  and  $C_P$  pools, respectively.

## Supplementary figures

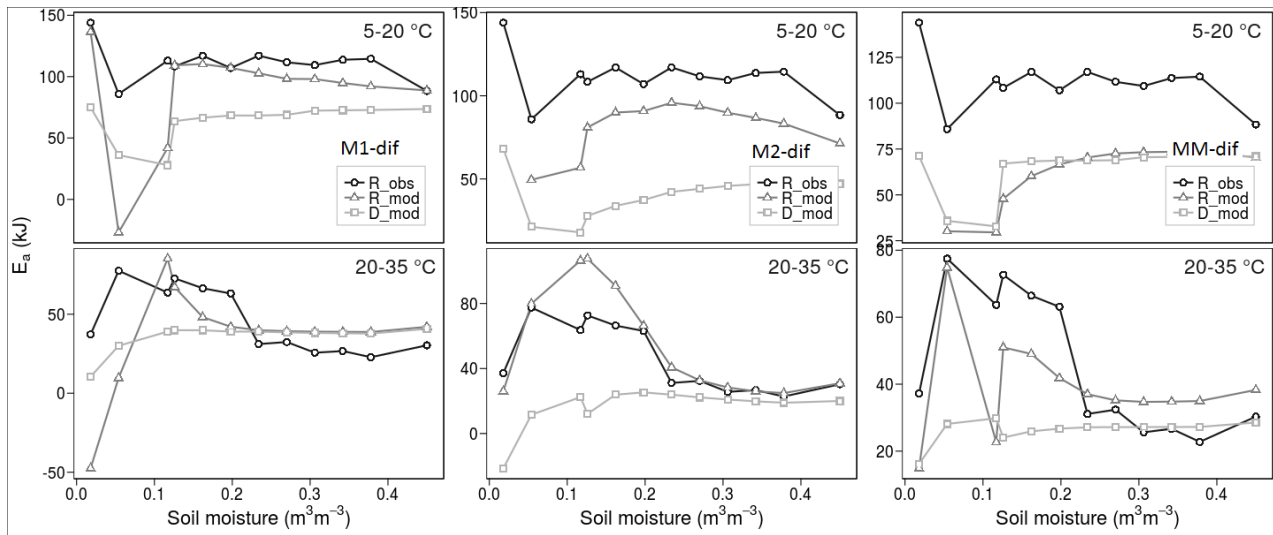

5 **Figure S1: Relationships of apparent activation energies against soil volumetric moisture content. Values are given for measured and modelled respiration and for modelled decomposition. Each plot compares observed values against a different calibrated model (M1-dif, M2-dif and MM-dif). Apparent activation energies are shown for the temperature ranges 5-20 (top panel) and 20-35 °C (bottom panel).**

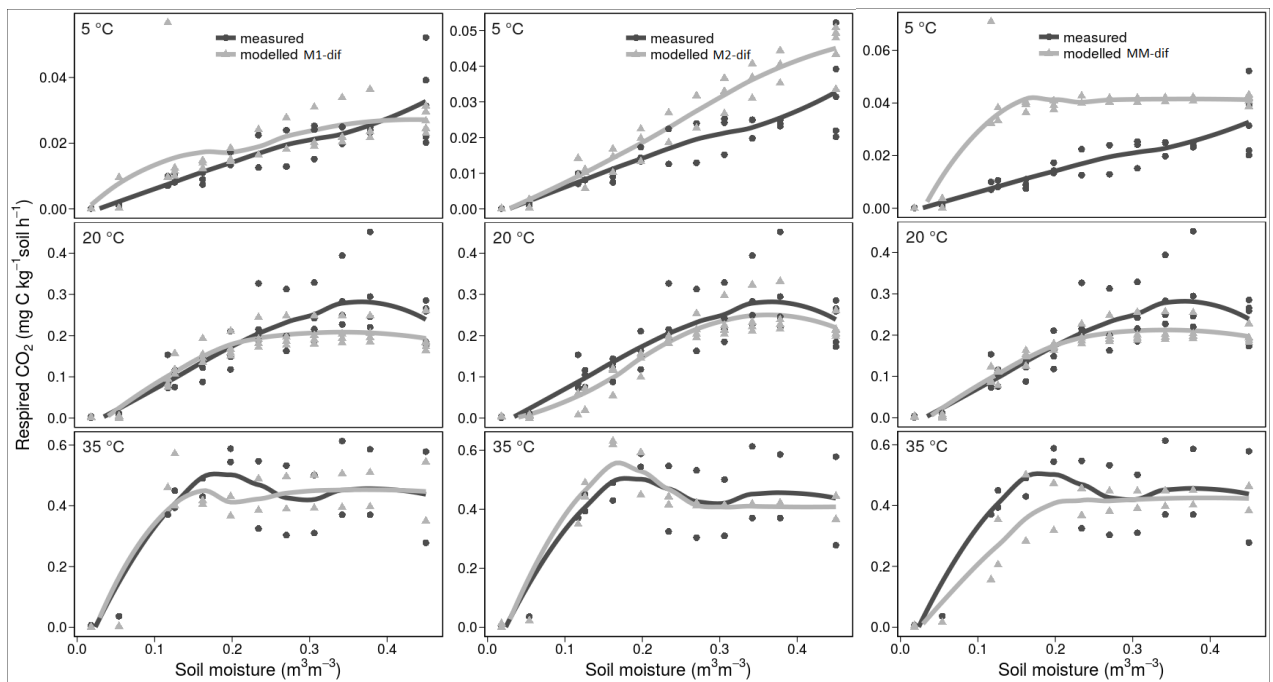

10 **Figure S2: The relationship between respiration rates and soil moisture content shown for measured and modelled values. Each plot compares the measurements a different model (M1-dif, M2-dif, MM-dif). Lines are a smooth loss fit to show the average relationship.**

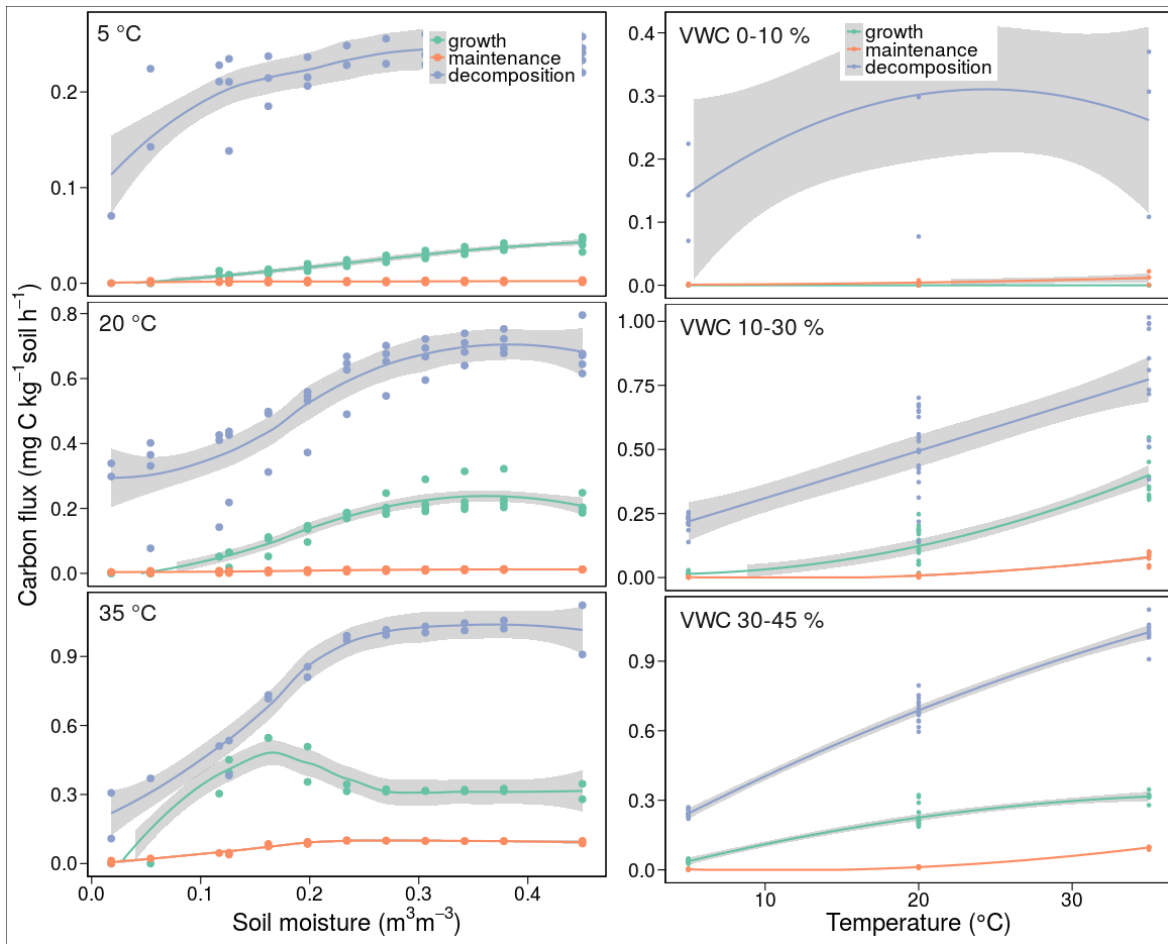

**Figure S3: Respiration (growth and maintenance) and decomposition fluxes modelled using M2-dif against soil moisture (left plot) and soil temperature (right plot). Shaded areas denote the 95% confidence intervals from a loess fit.**

5

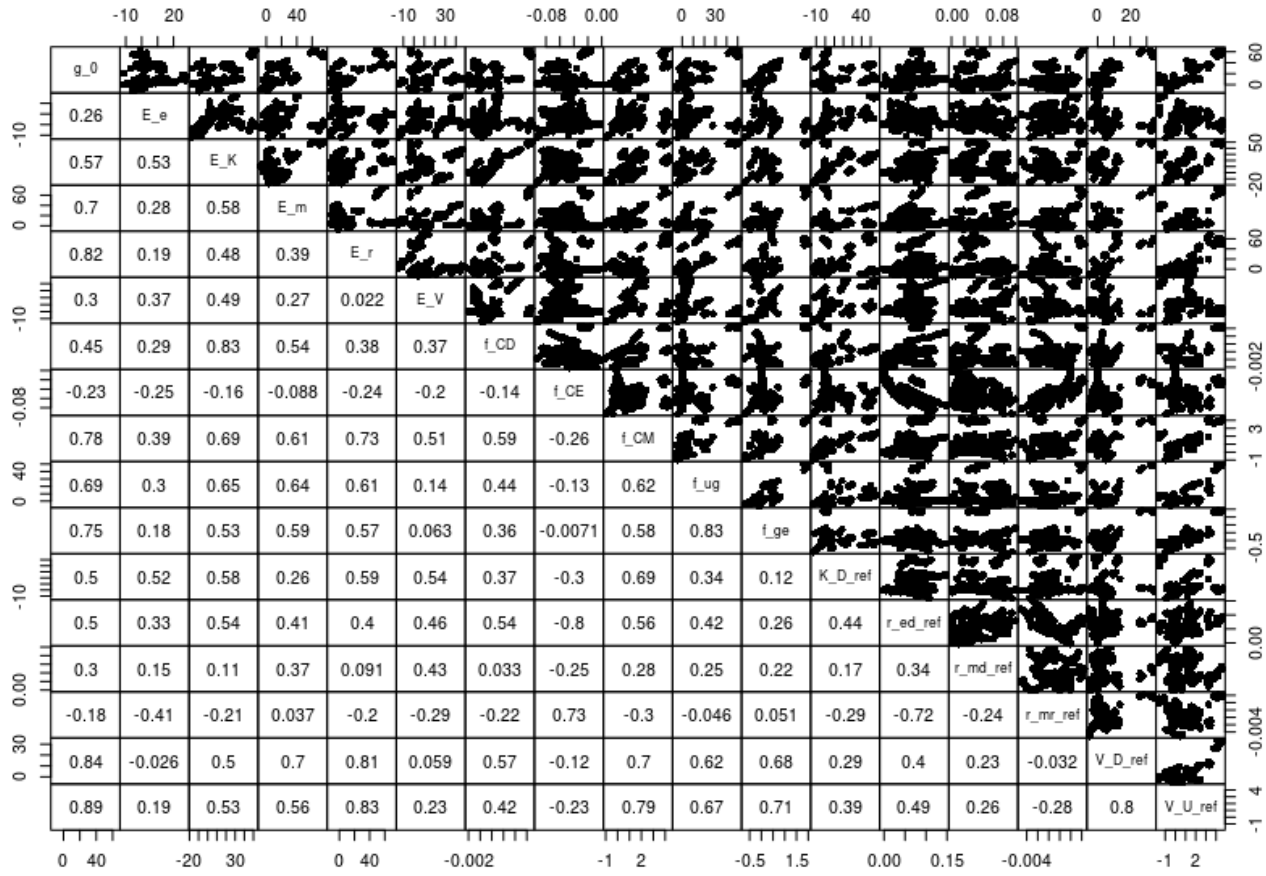

Figure S4: Correlations between sensitivity functions of model parameters (obtained by using R function sensFun from package FME). All  $R^2$  values are below 0.9 but several are above 0.8, e.g. between  $V_U_{ref}$  and  $g_0$  (0.89),  $V_U_{ref}$  and  $E_r$  (0.83),  $V_D_{ref}$  and  $g_0$  (0.84),  $f_{CD}$  and  $E_K$  (0.83) and  $V_D_{ref}$  and  $V_U_{ref}$  (0.8),  $f_{ug}$  and  $f_{ge}$  (0.83).

5

10

Table S1: Calibrated model parameters with initial values and lower and upper bounds.

| Name          | Units                | Initial value | Lower bound | Upper bound | Calibrated value |
|---------------|----------------------|---------------|-------------|-------------|------------------|
| $g_0$         | $\text{h}^{-1}$      | 1.4           | 0.1         | 10          | 2.2              |
| $E_{a_K}$     | $\text{kJ}$          | 90            | 10          | 130         | 89               |
| $E_{a_r}$     | $\text{kJ}$          | 90            | 10          | 130         | 95               |
| $E_{a_v}$     | $\text{kJ}$          | 90            | 10          | 130         | 87               |
| $f_D$         | -                    | 8.8E-05       | 1E-05       | 0.001       | 9.2e-5           |
| $f_E$         | -                    | 0.00058       | 1E-05       | 0.001       | 6.1e-4           |
| $f_M$         | -                    | 0.043         | 0.001       | 0.1         | 0.071            |
| $f_{ug}$      | -                    | 0.6           | 0.3         | 0.8         | 0.7              |
| $f_{ge}$      | -                    | 0.025         | 0.01        | 0.1         | 0.025            |
| $K_{D\_ref}$  | $\text{kg C m}^{-3}$ | 60            | 30          | 300         | 50               |
| $n$           | -                    | 2.7           | 1           | 3           | 2.3              |
| $m$           | -                    | 1.2           | 1           | 3           | 1.2              |
| $r_{ed\_ref}$ | $\text{h}^{-1}$      | 0.0002        | 1E-05       | 0.001       | 5e-4             |
| $r_{md\_ref}$ | $\text{h}^{-1}$      | 0.002         | 0.001       | 0.01        | 1.5e-3           |
| $r_{mr\_ref}$ | $\text{h}^{-1}$      | 4E-05         | 1E-06       | 0.001       | 4.2e-5           |
| $V_{D\_ref}$  | $\text{h}^{-1}$      | 0.3           | 0.1         | 1           | 0.35             |
| $V_{U\_ref}$  | $\text{h}^{-1}$      | 0.09          | 0.01        | 0.1         | 0.092            |
